# Supplementary material
Source: Research Square preprint supplement (doi:10.21203/rs.3.rs-9718484/v1)
Supplement: Supplementary file 1 [file 5574a2ac072eb18d9a3238ee.docx]

**Regulation of Digital Health Technologies in Ghana – Focus Group Discussion Guide for Patients on Akoma pa project.**

**Opening Questions:**

| Background information of participants: |  |
| --- | --- |
| Age |  |
| Gender |  |
| Marital status |  |
| Region |  |
| Employment status |  |
| Years diagnosed of condition |  |
| Place of residence |  |
| Religion |  |
| Years enrolled on Akoma pa |  |
| Date of FGD |  |
| Start time: | End time: |

**Introductory Questions**

1. How familiar are you with digital health technologies in general? (like telemedicine, mHealth, health apps, Artificial Intelligence in Health, etc)

**Transition Questions**

1. What motivated your interest in enrolling in Akoma Pa and adopting digital health solutions (SPICE App)?

**Key Questions**

1. Please share with me your knowledge of policies, regulations or guidelines that oversee digital health technologies usage in Ghana?
2. From your perspective, how effective do you feel the current regulatory approach, (if any, in relation to the spice app), has been?
3. What are its strengths, weaknesses, opportunities, and threats to the use of the App?
4. What major regulatory gaps or challenges still need to be addressed in your view?
5. With your experience in Akoma Pa project, what would be your perspectives/views/comments on:
6. Patient Safety
7. Privacy and Data Protection
8. Patient Rights
9. Ethics of patient-Healthcare professional interactions

Statements to guide discussion on above topics:

| **Patient Safety** |
| --- |
| Do you think that digital health technologies might compromise patient safety, and why? |
| Can you comment on the competencies of healthcare providers in using digital tools to ensure patient safety |
| How confident are you in the encryption and cybersecurity of digital health information, and why? |
|  |
| **Privacy and Data Protection** |
| Do you feel that my health information is well-protected when using digital health tools and why? |
| Can you describe how worried you are about the potential misuse of your personal data in digital healthcare |
| Can you comment on whether your health data will be solely used for the sole purpose of improving my healthcare |
| Can you describe your comfortability with sharing personal health information in digital forms and why? |
| Can you describe your satisfaction with the options available to protect your health data privacy? |
| **Patient Rights** |
| What is your position on digital interventions pertaining to respect and upholding patient rights. |
| Do you feel that you right as a patient are at risk when using digital healthcare services. |
|  |
| **Ethical principles** |
| Can you comment on the informed consent process for using digital health services  A. clear  B. transparent |
|  |

1. How can/should regulators better coordinate/engage with you, as patients, on regulation of digital health?
2. What role should stakeholders like yourselves play in shaping regulations moving forward?

**Conclusion**

1. Is there anything else you would like to add regarding digital health regulation that we have not yet covered in our discussion today?

**Thank participant.**
