# Supplementary material
Source: Research Square preprint supplement (doi:10.21203/rs.3.rs-9718484/v1)
Supplement: Supplementary file 2 [file c8e908b86bb3b71b3c44ba28.docx]

**Regulation of Digital Health Technologies in Ghana:**

**Akoma pa Patients' Questionnaire (Survey)**

Patient unique ID:____________________

# Section A: Socio-demographic characteristics of respondents

1. Age of respondent: ________________

Please, this is the last birthday you celebrated

1. Gender of respondent

- Male
- Female
- Prefer not to say

1. Marital status

- Single, not in any union
- Single, but cohabiting
- Married
- Divorced/Separated
- Widowed

1. Educational level of respondent

- No formal education
- Primary
- JSS/JHS/Middle school
- SHS/SSS/O-level/A-level
- Tertiary e.g Diploma, HND, Degree, PGD certs, Masters, PhD

1. Employment status:

- Employed
- Unemployed
- Pensioner/retiree

1. Occupation, if employed

- Sales and services
- Civil/public servant
- Private sector
- Self-employed
- Entrepreneurship
- Agriculture/farming
- Artisan e.g Driver, Masonry, Tiler, Plumber, Kente weaver, etc
- Other Please, specify___________________________

1. Religion of respondent

- Christian
- Islam/Moslem
- African Traditional religion
- No religion/atheist

1. Place of residence

- Rural
- Peri-urban
- Urban

1. Monthly income (Ghana cedis)

- <1000
- 1000 - 2000
- 2001 - 3000
- >3000

1. Flow of income in the past year

- No earnings
- Irregular
- Regular

1. Do you have a valid NHIS card

- No
- Yes

1. Household size:_____________________
2. Ethnicity:

- Akan e.g Fante, Akuapem, Sefwi, Ashanti, Bono, Denkyira among others
- Ga-adangbe
- Ewe/Krobo
- Dagomba/mamprusi
- Other: Please, specify___________________

1. Region of respondent

- Ashanti
- Bono
- Bono-East
- Ahafo
- Western-North
- Western
- Central
- Eastern

15. Name of health facility

- Emmanuel Methodist hospital
- Dabaa Hope hospital
- Global Evangelical hospital
- St. Anthony Ann's hospital
- Hart Adventist hospital, Ahinsan
- Power House Hospital
- St. Benito's hospital
- Methodist Faith healing hospital
- Church of God clinic
- St. Edward's Hospital
- St. Peter's hospital
- Akoma Memorial SDA hospital
- St Martin's Catholic Hospital
- Presbyterian hospital, Agogo
- St Michael's hospital, Jachie Pramso
- Church of Christ hospital, Bomso
- HopeXchange Medical centre, Santasi
- Kwadaso SDA hospital
- Janie Speaks AME hospital, Akumadan
- True Faith hospital, Bodomase
- Church of God Hospital, Essieninpong
- St. John of God, Duayaw Nkwanta
- Pentecost Clinic, Kasapin
- Kyeremasu Presby clinic
- SDA hospital, Sunyani
- St Matthew's clinic, Ampenkro
- Holy Family hospital, Berekum
- St. Theresah hospital, Nkoranza
- Holy Family hospital, Techiman
- Salvation Army polyclinic, Duakwa
- Our Lady of Grace hospital, Asikuma
- St. Francis Xavier hospital, Assin Fosu
- Nsuta Presby clinic
- Hope Christian hospital, Gomoa Fetteh
- St. Luke's hospital, Apam
- Salvation Army clinic, Anum
- Komm Health centre
- Catholic Clinic and Maternity, Akim Swedru
- Jubilee Catholic Children's hospital
- Holy Child hospital, Takoradi
- Nagel Memorial SDA hospital
- Kwawu Pentecost hospital
- Presbyterian Health centre, Aowin
- Suaman St. John of God (Bia) Annex clinic

# Section B: Perspectives of Akoma pa patients

1. How long have you been on the Akoma pa SPICE APP

- Less than a year
- 1 - 3
- 4 - 6
- 7 or more

1. Have you ever searched for regulatory information related to digital health technologies?

- No
- Yes

1. When seeking regulatory information about digital health technologies (SPICE App or others) where do you turn to?

- Family and friends
- Health profession/facility
- Social media [Facebook, Twitter]
- Television/radio
- Print media (newspaper, magazine, information leaflets)
- Dedicated websites/forums/reviews Internet search
- Other: Please, specify_________

1. How well do you trust DHT regulatory information from these sources:

Don’t Trust || Little trust || Neutral || Somewhat Trust || Moderately Trust || Highly Trust

a. Family and friends

1. Health facility/professionals
2. Social media
3. Television/radio
4. Print media (newspaper, magazine)
5. Dedicated websites/server, forums, reviews
6. Internet search
7. Is your information anonymised/protected (identity hidden) during transmission when using Akoma pa SPICE APP?

- No
- Yes
- Not sure

1. Can your health information be easily deleted from the SPICE APP in the event you discontinue treatment or relocate

- No
- Yes
- Not sure

1. Would the assurance of anonymity influence your decision to use a particular digital health technology?

- Not at all
- Slighly
- Moderately
- Significantly

1. Do yo request information before you access your health information?

- No
- Yes

1. Do you trust or influence the health information on the SPICE APP?

- No
- Yes

1. Do you know/aware that Akoma pa shares your health information with any third party without your knowledge?

- No data shared with third spaces
- Data is anonymised before sending/sharing
- I am not aware of such information

# C: Privacy, confidentiality, and anonymity of health data

1. Were your consent sought before enrolling you to the SPICE APP

- no
- yes

1. Do you think your health information is kept private

- No
- Yes
- Dont know

1. I think that my health information/data is kept confidential from unauthorised persons

- Strongly agree
- Agree
- Neither agree nor disagree
- Disagree
- Strongly disagree

1. In case of breach of confidentiality/privacy of your health information/data, what would you do?

- Go for support
- Speak to health professional/facility
- Report to family and friends
- Use social media platforms
- Take legal counsel (medico-legal issues) Report to regulatory authority
- Other: Please, specify____________

D: Digital health technologies regulatory information usage and trust

1. How likely are you going to use health information from these sources:

Very unlikely || Unlikely || Neutral || Likely || Very likely

1. Family and friends
2. Healthcare professional/facility
3. Social media
4. Television/radio
5. Print media (newspaper, magazine and info leaflets)
6. Dedicated websites/forums/reviews
7. Internet search
8. Will pricing affect your trust in technology use in health (SPICE App in Akoma pa)

- Significantly
- Moderately
- Slightly influence
- Does not influence my trust

1. As a patient, what aspect of the SPICE app is a major concern to you

- No concern
- Data erasure
- Confidentiality/privacy of health data
- Security of my data
- Other: Please, specify_______________

1. Are you aware that there is a regulator who supervise data privacy, confidentiality, anonymity, and security of health data?

- No
- Yes
- Don’t know

1. If yes, do you trust that there are regulations to ensure privacy, confidentiality and anonymity of health information

- No
- Yes
